# Supplementary material for: Structural insights into α-synuclein monomer–fibril interactions
Source: PubMed Central journal article supplement — Proc Natl Acad Sci U S A. 2021 Mar 1;118(10):e2012171118. doi: 10.1073/pnas.2012171118 (PMC7958257; doi:10.1073/pnas.2012171118), 2021-03-01
Supplement: pnas.2012171118.sapp.pdf [file pnas.2012171118.sapp.pdf]

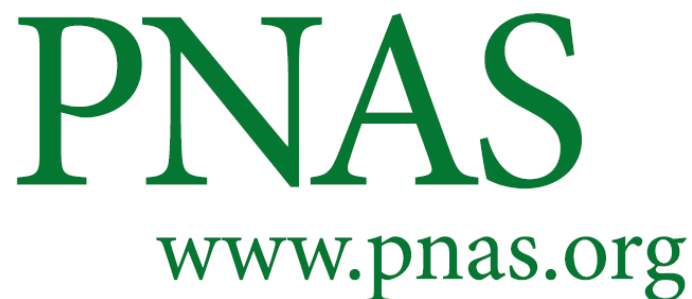

Supplementary Information for

**Structural insights into  $\alpha$ -synuclein monomer-fibril interactions**

Pratibha Kumari<sup>a,1</sup>, Dhiman Ghosh<sup>a,1</sup>, Agathe Vanas<sup>a</sup>, Yanick Fleischmann<sup>a</sup>, Thomas Wiegand<sup>a</sup>, Gunnar Jeschke<sup>a</sup>, Roland Riek<sup>a,2</sup>, and Cédric Eichmann<sup>a,b,2</sup>

<sup>a</sup>Department of Chemistry and Applied Biosciences, Laboratory of Physical Chemistry, ETH Zurich, 8093 Zurich, Switzerland

<sup>b</sup>Department of Biological Regulation, Weizmann Institute of Science, 76100 Rehovot, Israel

<sup>1</sup>P.K. and D.G. contributed equally to this work.

<sup>2</sup>To whom correspondence may be addressed. E-mail: roland.riek@phys.chem.ethz.ch or cedric.eichmann@phys.chem.ethz.ch

This PDF file includes:

Figures S1 to S8

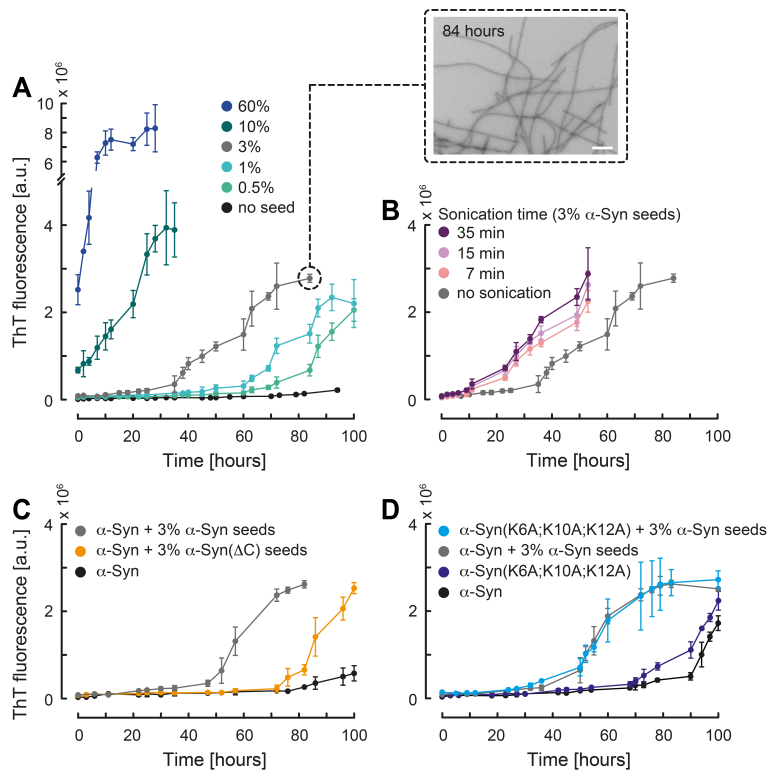

**Fig. S1. Secondary nucleation of  $\alpha$ -Syn at pH 7.** (A) Seeded aggregation kinetics of wild-type  $\alpha$ -Syn aggregation at constant monomer concentration with systematic variation of  $\alpha$ -Syn seeds from 0-60% (expressed as percentage of the concentration of monomeric  $\alpha$ -Syn) under quiescent conditions using mature fibrils without sonication at 37 °C. Inset, negative-stain EM of the ThT sample containing 3% seeds after 84 h of incubation, scale bar 400 nm. (B) Aggregation of wild-type  $\alpha$ -Syn in absence and presence of 3% sonicated seeds, sonication time 7, 15, and 35 min. (C) Aggregation kinetics of wild-type  $\alpha$ -Syn in absence and presence of 3% wild-type and  $\alpha$ -Syn( $\Delta$ C) seeds. (D) Comparison of wild-type and mutant  $\alpha$ -Syn(K6A;K10A;K12A) aggregation with and without addition of 3% wild-type  $\alpha$ -Syn seeds. Monomer sample concentrations are 300  $\mu$ M. Error bars denote standard deviations based on measurements on two independent replicate samples.

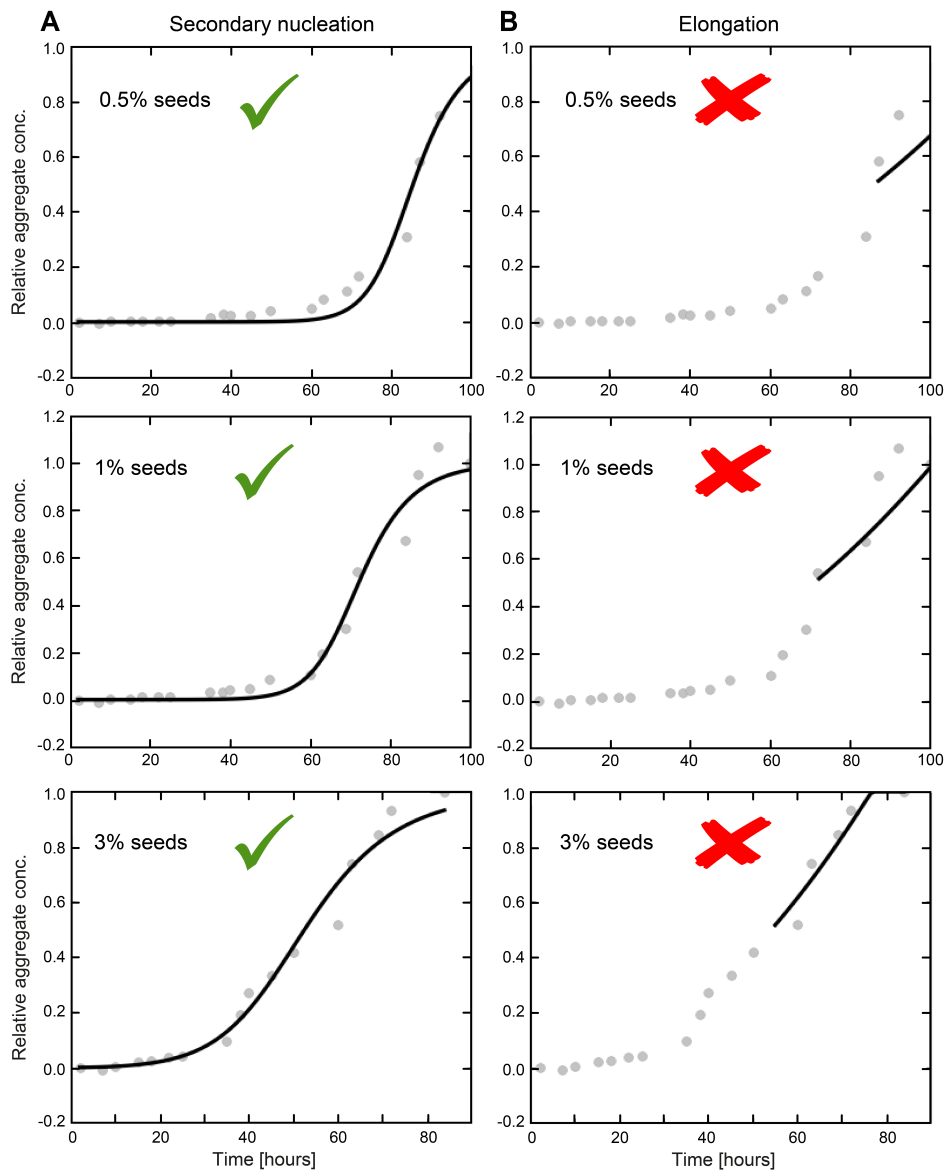

**Fig. S2. Mechanisms of  $\alpha$ -Syn aggregation.** Global fitting of seeded wild-type  $\alpha$ -Syn aggregation kinetics at pH 7 is consistent with (A) surface-catalyzed secondary nucleation but not with (B) elongation of fibrils.

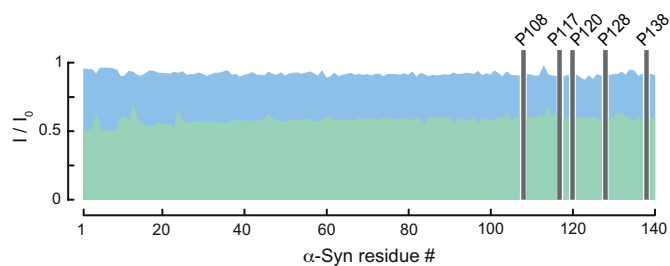

**Fig. S3. Aggregation of monomeric  $\alpha$ -Syn in presence of fibrils.** Residue-resolved NMR signal intensity ratios ( $I/I_0$ ) of monomeric  $\alpha$ -Syn before ( $I_0$ ) and after 5 h ( $I$ ) incubation with 5.4-fold molar excess of  $\alpha$ -Syn fibrils at pH 7 (blue) and pH 6 (green). Positions of C-terminal  $\alpha$ -Syn proline residues without peptide amide resonances are shown in one-letter amino acid code.

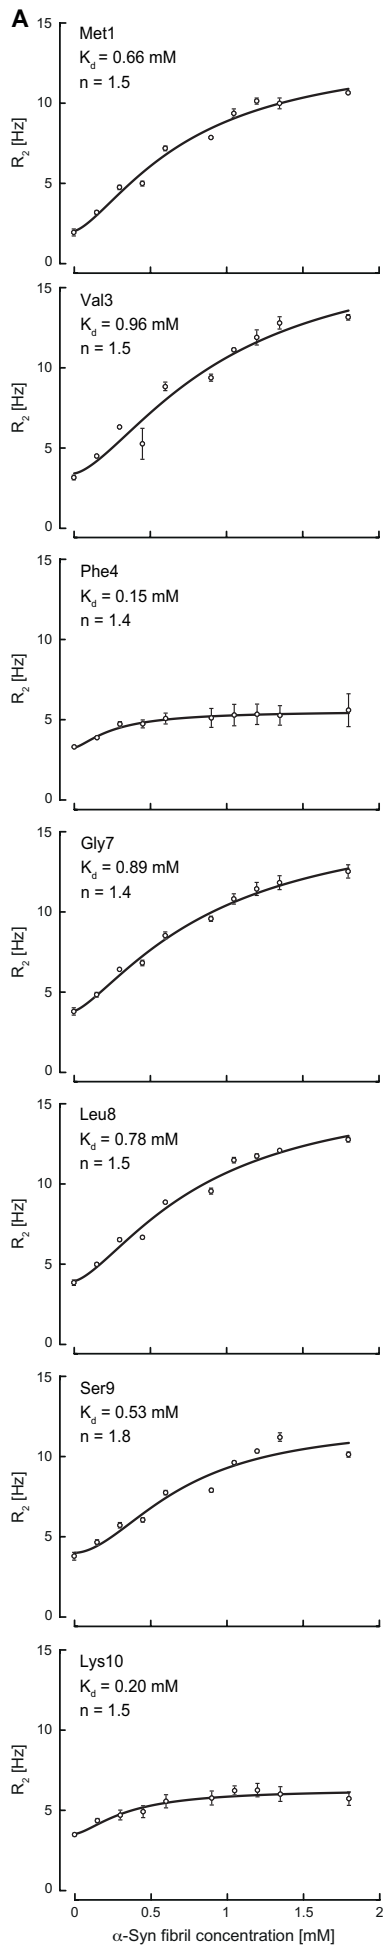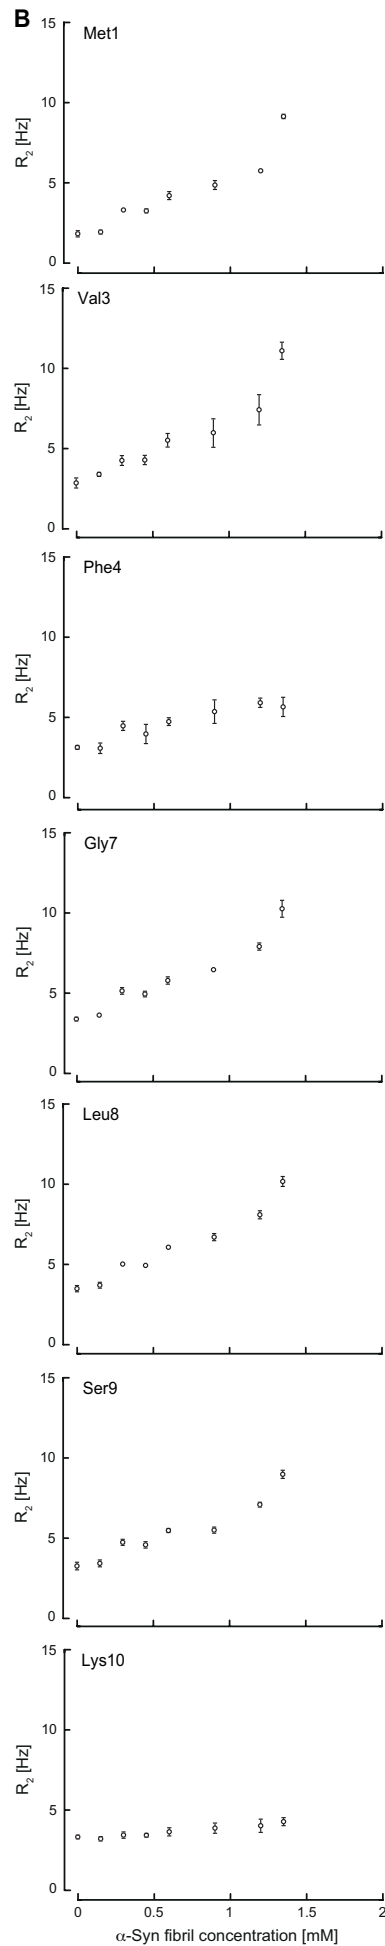

**Fig. S4. Kinetics of  $\alpha$ -Syn fibril interaction.**  $^{15}\text{N}$   $R_2$  relaxation rates of N-terminal  $\alpha$ -Syn residues in presence of increasing concentration of  $\alpha$ -Syn fibrils at (A) pH 7 were fitted by a hyperbolic binding function  $r = a + b \cdot n[\alpha\text{-Syn fibril}]^n / (K_d + [\alpha\text{-Syn fibril}]^n)$ ,  $n$  = number of fibril binding sites. (B) At pH 6, fast  $\alpha$ -Syn aggregation upon addition of  $\alpha$ -Syn fibrils did not allow fitting of the  $R_2$  data to determine  $K_d$  values.

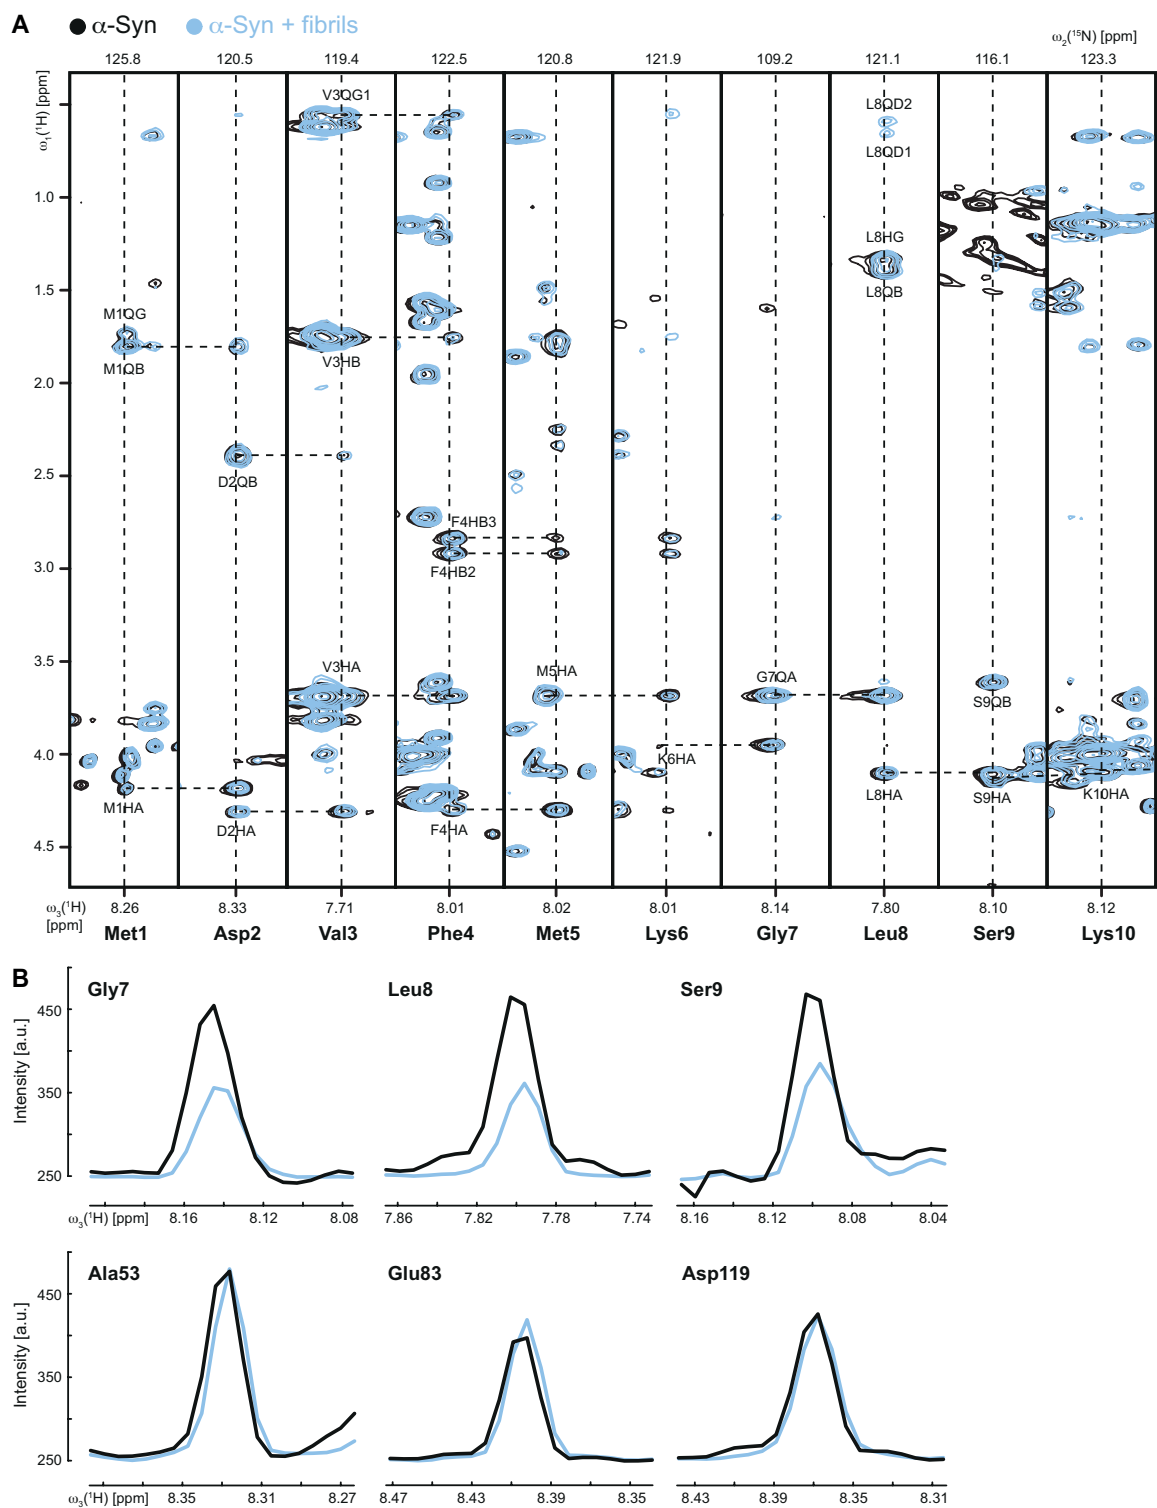

**Fig. S5. Absence of structural features in transiently fibril-bound  $\alpha$ -Syn.** (A)  $\omega_1(^1\text{H})/\omega_3(^1\text{H})$  strips obtained from 3D  $^{15}\text{N}$ -resolved  $[^1\text{H}, ^1\text{H}]$ -NOESY experiments for the 10 N-terminal residues of monomeric  $\alpha$ -Syn in absence (black) and presence of  $\alpha$ -Syn fibrils (blue, 6.7-fold molar excess of fibrils) at pH 7. The strips are centered about the amide proton chemical shifts and taken at the  $^{15}\text{N}$  chemical shifts of the amide groups

for the indicated residues. **(B)** 1D  $\omega_3(^1\text{H})$  cross sections of the diagonal peak intensities from the NOESY spectrum.





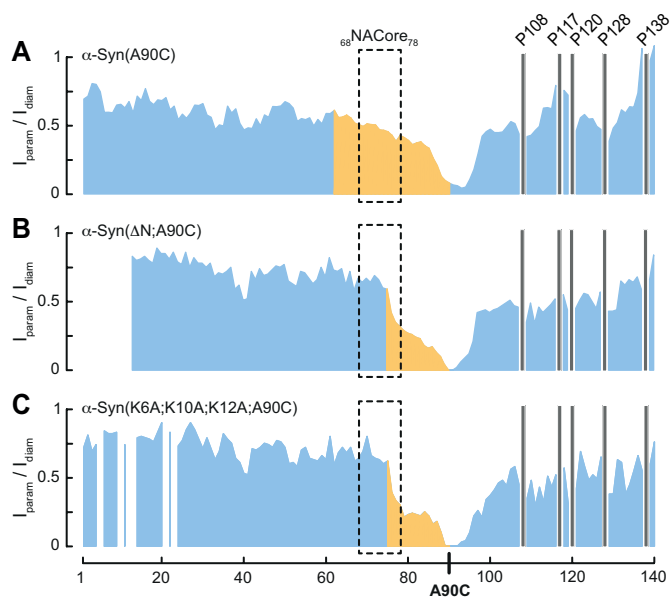

**Fig. S7. PRE of  $\alpha$ -Syn mutants.** Residue-resolved PRE intensity profiles  $I_{\text{param}}/I_{\text{diam}}$  of para- ( $I_{\text{param}}$ ) and diamagnetic ( $I_{\text{diam}}$ ) labeled (A)  $\alpha$ -Syn(A90C), (B)  $\alpha$ -Syn( $\Delta$ N;A90C) and (C)  $\alpha$ -Syn(K6A;K10A;K12A;A90C) at pH 7. Positions of C-terminal  $\alpha$ -Syn proline residues without peptide amide resonances are shown in one-letter amino acid code.

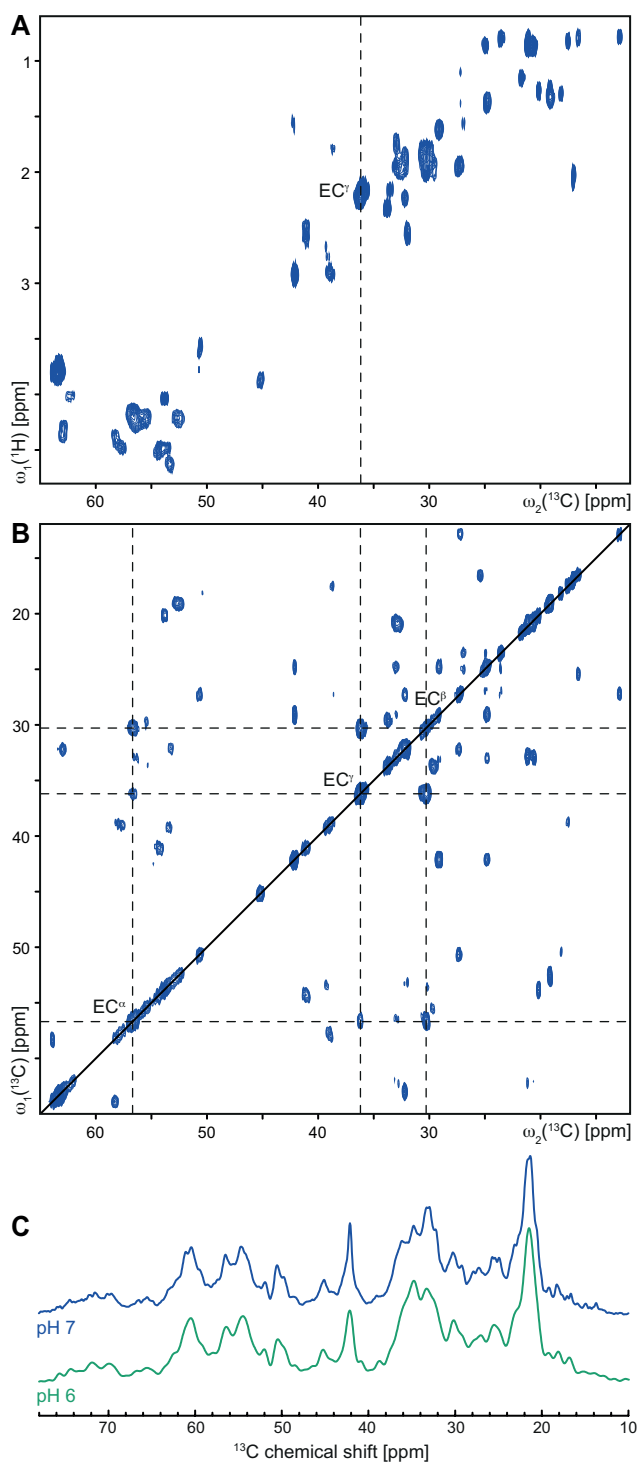

**Fig. S8. Solid-state NMR assignment of the Glu side-chain atoms in the mobile region of  $\alpha$ -Syn fibrils.** (A) 2D  $^1\text{H}$ - $^{13}\text{C}$  INEPT spectrum of  $\alpha$ -Syn fibrils. The cross-peak of Glu  $^{13}\text{C}^\gamma$  is indicated. (B) 2D  $^{13}\text{C}$ - $^{13}\text{C}$  INEPT-TOBSY spectrum of  $\alpha$ -Syn fibrils showing the spin system of the Glu side-chain. (C) 1D  $^{13}\text{C}$  MAS CP NMR spectra of  $\alpha$ -Syn fibrils at pH 7 (blue) and 6 (green). Salt-free conditions.
